# Supplementary material for: An Important Function of Petrosiol E in Inducing the Differentiation of Neuronal Progenitors and in Protecting Them against Oxidative Stress
Source: PubMed Central journal article supplement (PMC5644239; doi:10.1002/advs.201700089), 2017-07-05
Supplement: ADVS-4-na-s001.pdf [file ADVS-4-na-s001.pdf]

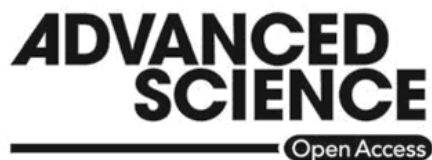

## Supporting Information

for *Adv. Sci.*, DOI: 10.1002/adv.201700089

An Important Function of Petrosiol E in Inducing the  
Differentiation of Neuronal Progenitors and in Protecting  
Them against Oxidative Stress

*Jing Liu, Linlin Wang, Yuguo Du,\* and Sijin Liu\**

Supplementary Figures

(A)

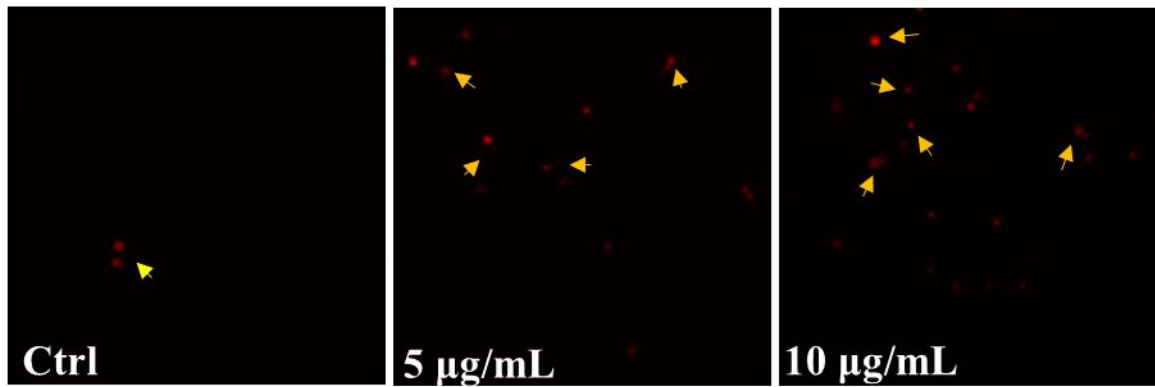

(B)

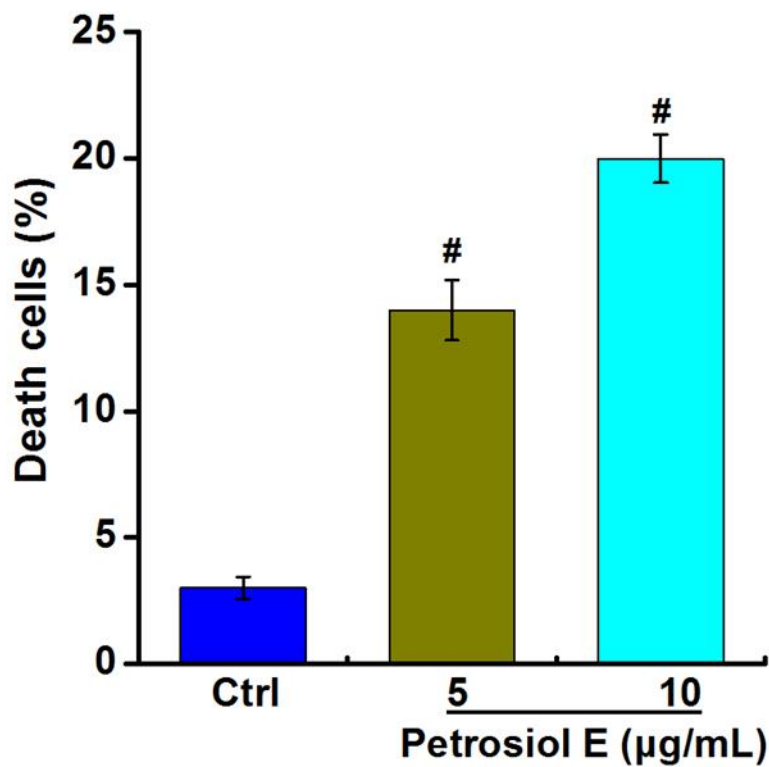

**Supplementary Figure 1. Cell death assessment upon Petrosiol E.** (A) PI staining of PC12 cells upon Petrosiol E treatment at 5 and 10 µg/mL for 24 h. (B) Quantitative analysis of dead cells after PI staining. \*: P<0.05, relative to control. #: P<0.001, relative to control.

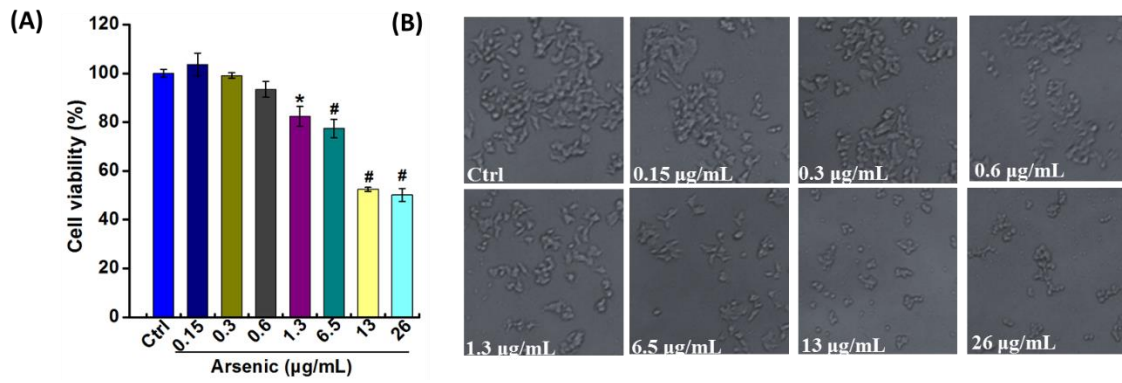

**Supplementary Figure 2. Cytotoxicity of PC12 cells treated with arsenic at different concentrations.** (A) Cell viability assessment of PC12 cells upon arsenic treatment for 24 h through the MTT assay. (B) The morphology of PC12 cells after arsenic exposure for 24 h. \*:  $P < 0.05$ ; #:  $P < 0.001$ , relative to control.

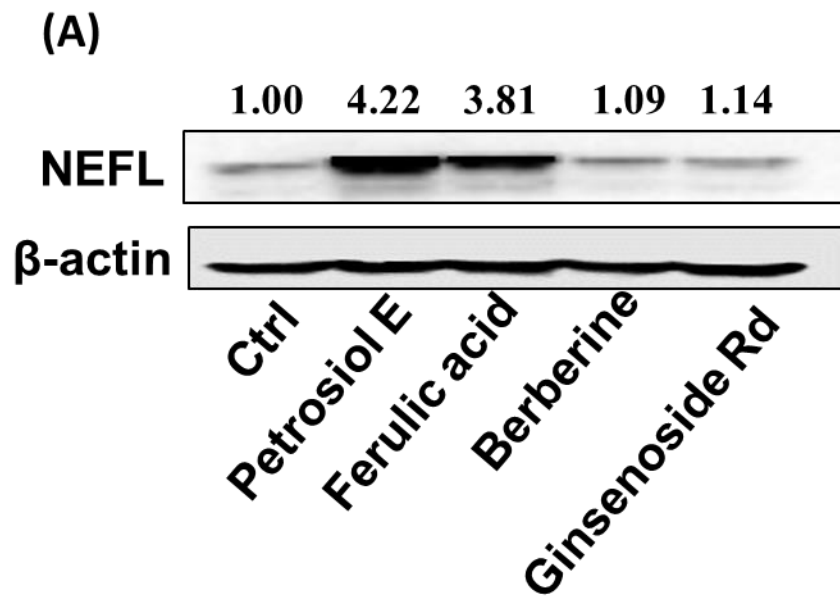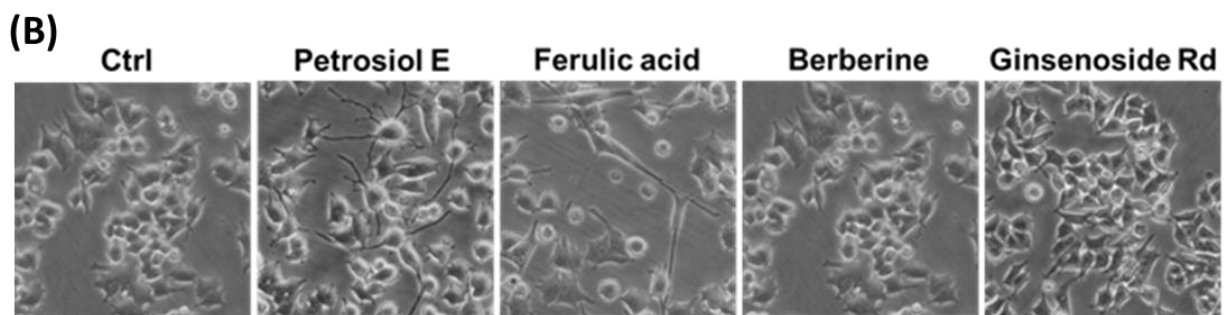

**Supplementary Figure 3. Neurite outgrowth of PC12 cells upon different compounds.** (A) NEFL concentrations and (B) morphological alterations in PC12 cells treated with Petrosiol E, Ferulic acid, Berberine and Ginsenoside Rd at 2.5  $\mu\text{g}/\text{mL}$  for 3 days.
